# Supplementary material for: Application of quasi-equilibrated thermodesorption of linear and di-branched paraffin molecules for detailed porosity characterization of the mono-layered zeolite MCM-56, in comparison with MCM-22 and ZSM-5
Source: Royal Society of Chemistry journal article supplement (doi:10.1039/c4dt00232f), 2014-01-01
Supplement: c4dt00232f1.pdf [file c4dt00232f1.pdf]

Application of quasi-equilibrated thermodesorption of linear and di-branched paraffin molecules for detailed porosity characterization of mono-layered zeolite MCM-56, in comparison to MCM-22 and ZSM-5

by Waclaw Makowski, Kinga Mlekodaj, Barbara Gil, Wieslaw J. Roth, Bartosz Marszałek, Martin Kubu, Pavol Hudec, Agáta Smiešková, Michal Hornáček

### Supplementary information

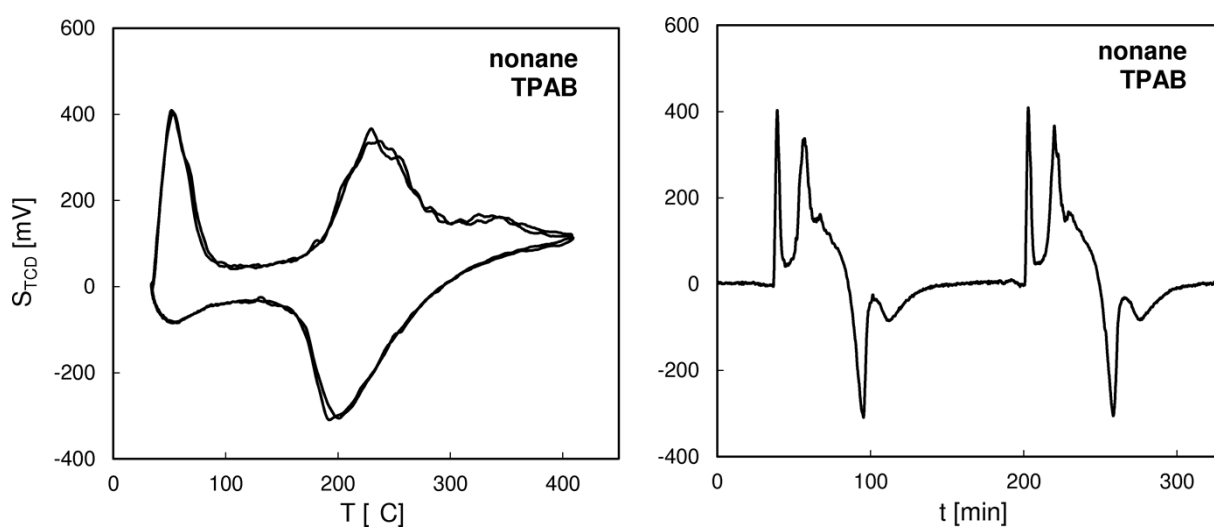

Sup. Fig. 1. Comparison of the QE-TPDA profiles of nonane observed for ZSM-5-TPAB at 10°C/min in two following desorption-adsorption cycles (cf. Fig. 5).

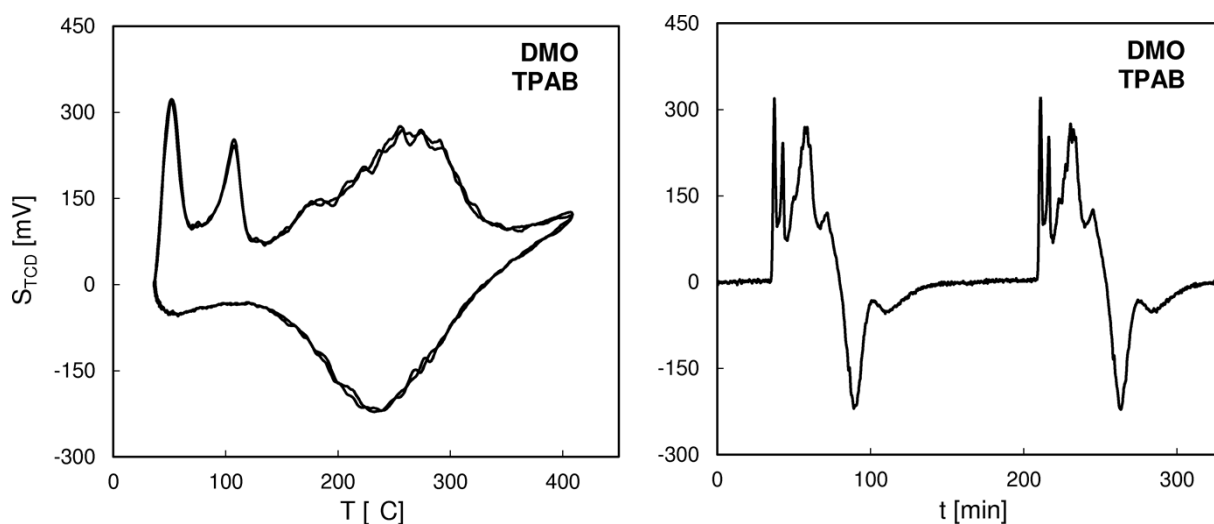

Sup. Fig. 2. Comparison of the QE-TPDA profiles of DMO observed for ZSM-5-TPAB at 10°C/min in two following desorption-adsorption cycles (cf. Fig. 6).
